# Supplementary figures and images for: The Diploid Genome Sequence of an Individual Human
Source: PLOS journal article supplement (doi:10.1371/journal.pbio.0050254), 2007-08-31

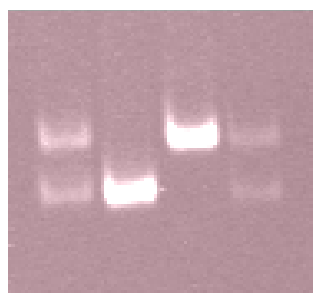

1 2 3 4

**Figure S1**

Supplement: S1 (10.1371/journal.pbio.0050254.s001) [file journal.pbio.0050254.s001]
